# Supplementary material for: Botulinum toxin A complex exploits intestinal M cells to enter the host and exert neurotoxicity
Source: PubMed Central journal article supplement (PMC4339894; doi:10.1038/ncomms7255), 2015-02-17
Supplement: ncomms7255-s1.pdf [file ncomms7255-s1.pdf]

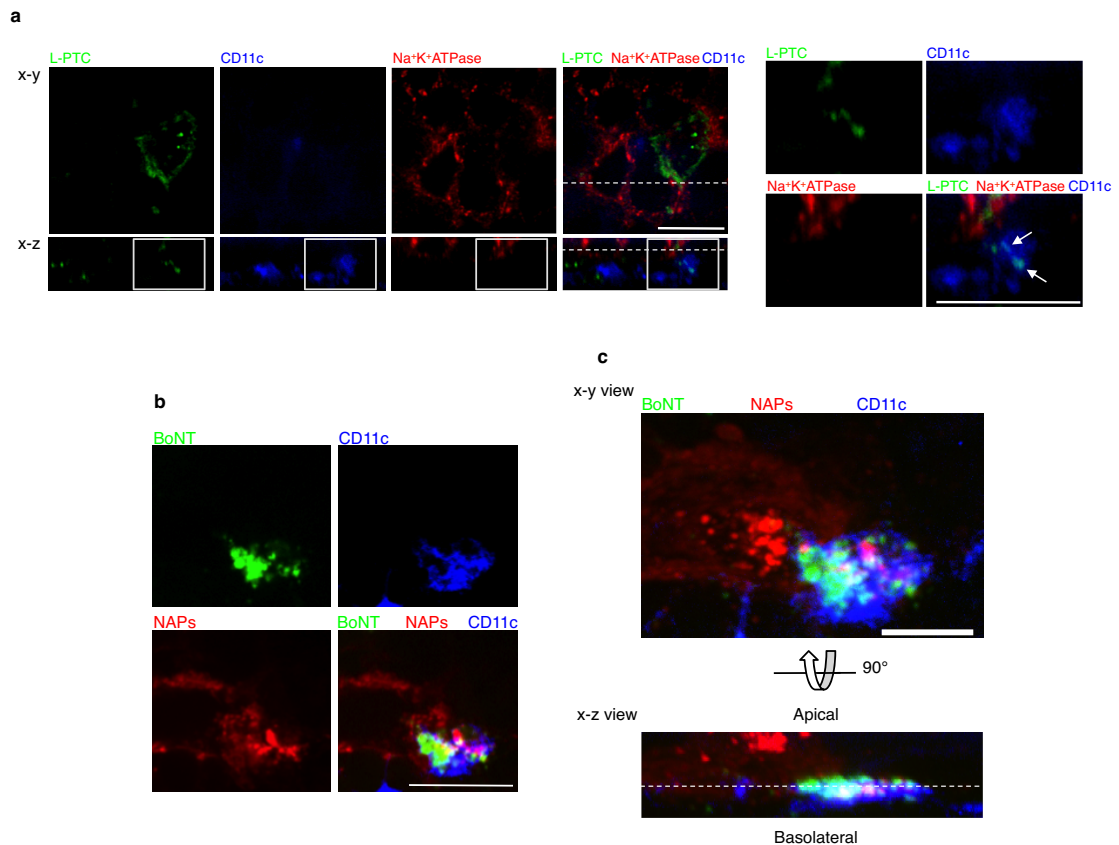

### Supplementary Figure 1: Co-localization of reconstituted L-PTC and dendritic cells

**(DCs).** **(a)** Alexa Fluor 488–labeled L-PTC (green) was injected into ligated mouse intestinal loops and incubated for 3 h; FAE regions were stained with a anti-Na<sup>+</sup>K<sup>+</sup>ATPase antibody (basolateral marker), Cy3–labeled anti-rabbit IgG antibody (red), and Pacific Blue–labeled anti-CD11c antibody (DC marker, blue). X-Z images in lower panels correspond to the positions indicated by dotted lines in the X-Y images. Right panels show a higher-magnification image of the boxed region. L-PTC were captured by DCs in the SED (arrows). **(b and c)** For reconstitution of the L-PTC, Alexa Fluor 488–labeled BoNT (green) and Alexa Fluor 568–labeled NAPs (red) were mixed at a molar ratio of 5:1 (1000 nM : 200 nM) in PBS (pH 6.0), and then incubated for 3 h at 37°C. Reconstituted L-PTC was confirmed by pull-down using lactose gel beads (EY Laboratories, Inc.),

which bound to HA, followed by immunoblotting with anti-L-PTC antibody (data not shown). Reconstituted L-PTC was injected into ligated intestinal loops and incubated for 3 h. FAE was stained with a Pacific Blue–labeled anti-CD11c antibody (blue). **(b)** X-Y view. **(c)** Three-dimensional data, Top, X-Y view. Bottom, side (X-Z) view. X-Y images **(b)** correspond to the position indicated by dotted line in the X-Z view **(c)**. For three-dimensional imaging, see Supplementary Movie 1. Scale bars: 10  $\mu\text{m}$  (**a**, **b**, and higher-magnification images in **a**); 5  $\mu\text{m}$  (**c**). Data are representative of two independent experiments.

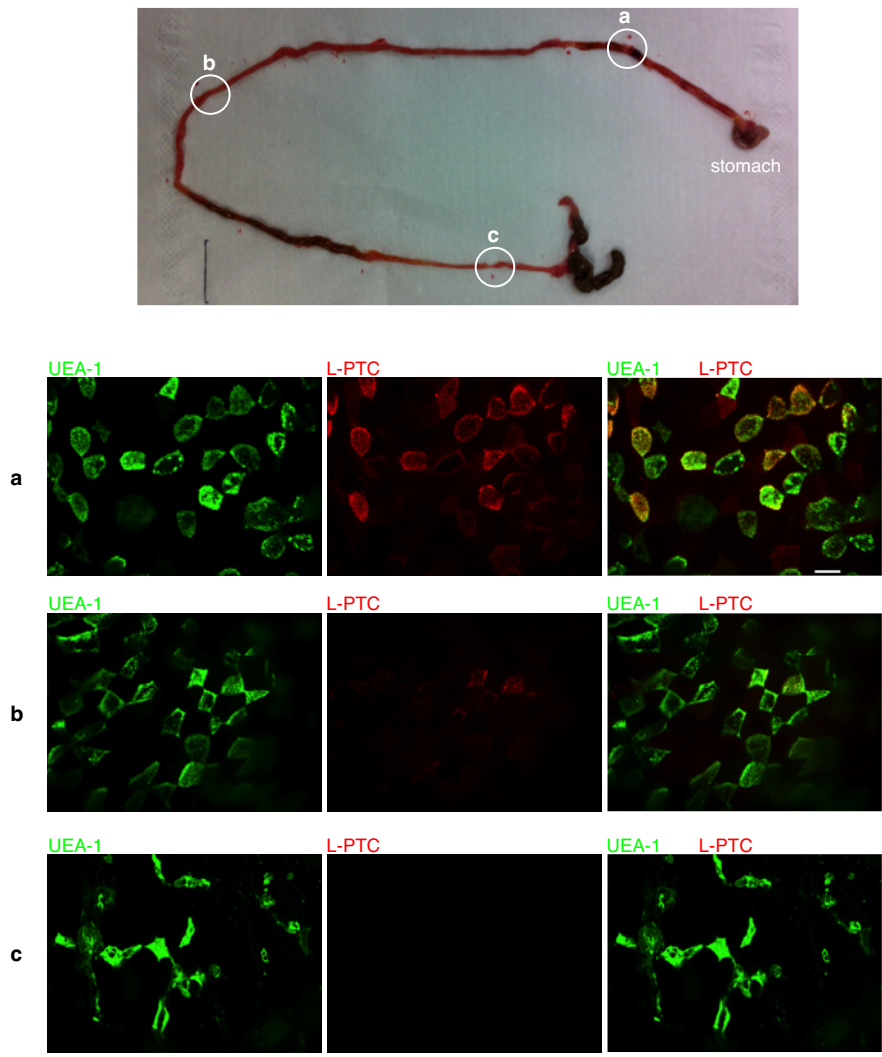

**Supplementary Figure 2: Localization of orally administered L-PTC in small intestine.** Alexa Fluor 568–labeled L-PTC (26.7 pmol: 20  $\mu$ g, red) was intragastrically administered to mice and incubated for 1 h. After incubation, the small intestine was removed, and PPs were excised from this tissue. PPs from duodenum (**a**), jejunum (**b**), or ileum (**c**) were stained with FITC–labeled UEA-1 (green), and analyzed on a confocal laser microscope. Scale bar, 10  $\mu$ m. Data are representative of two independent experiments.

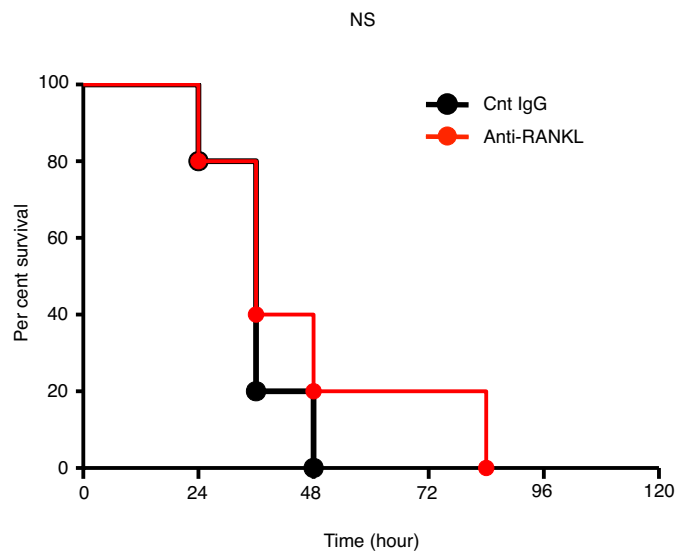

**Supplementary Figure 3: M-cell depletion does not influence lethality upon oral administration of M-PTC.** Mice were treated intraperitoneally with anti-RANKL antibody or control rat IgG. M-PTC were intragastrically (174.4 pmol: 50  $\mu$ g) administered to mice treated with anti-RANKL antibody or rat IgG ( $n = 5$  per group). Statistical analyses were performed with the log-rank test. NS, not significant.

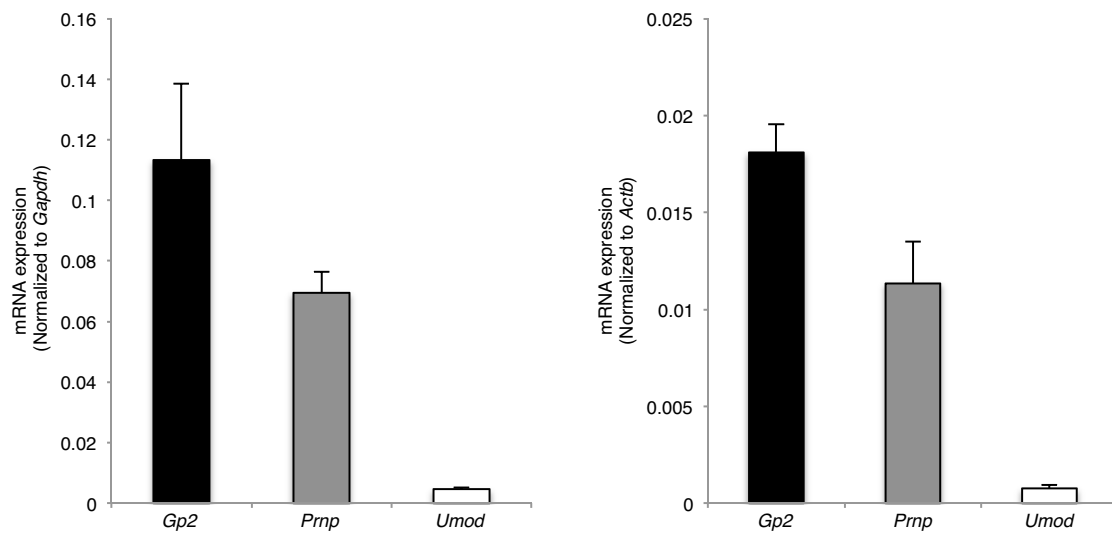

**Supplementary Figure 4: qPCR analysis of mouse GP2, PrP<sup>C</sup>, and uromodulin**

**mRNAs.** Total RNA was prepared from FAE. Expression of each gene was analyzed by real-time qPCR. The expression levels of mRNAs encoding GP2 (*Gp2*), PrP<sup>C</sup> (*Prnp*), and uromodulin (*Umod*) were normalized to the level of the mRNA encoding glyceraldehyde-3-phosphate dehydrogenase gene (*Gapdh*, **a**) or  $\beta$ -actin (*Actb*, **b**). Error bars indicate s.d. ( $n=3$ ).

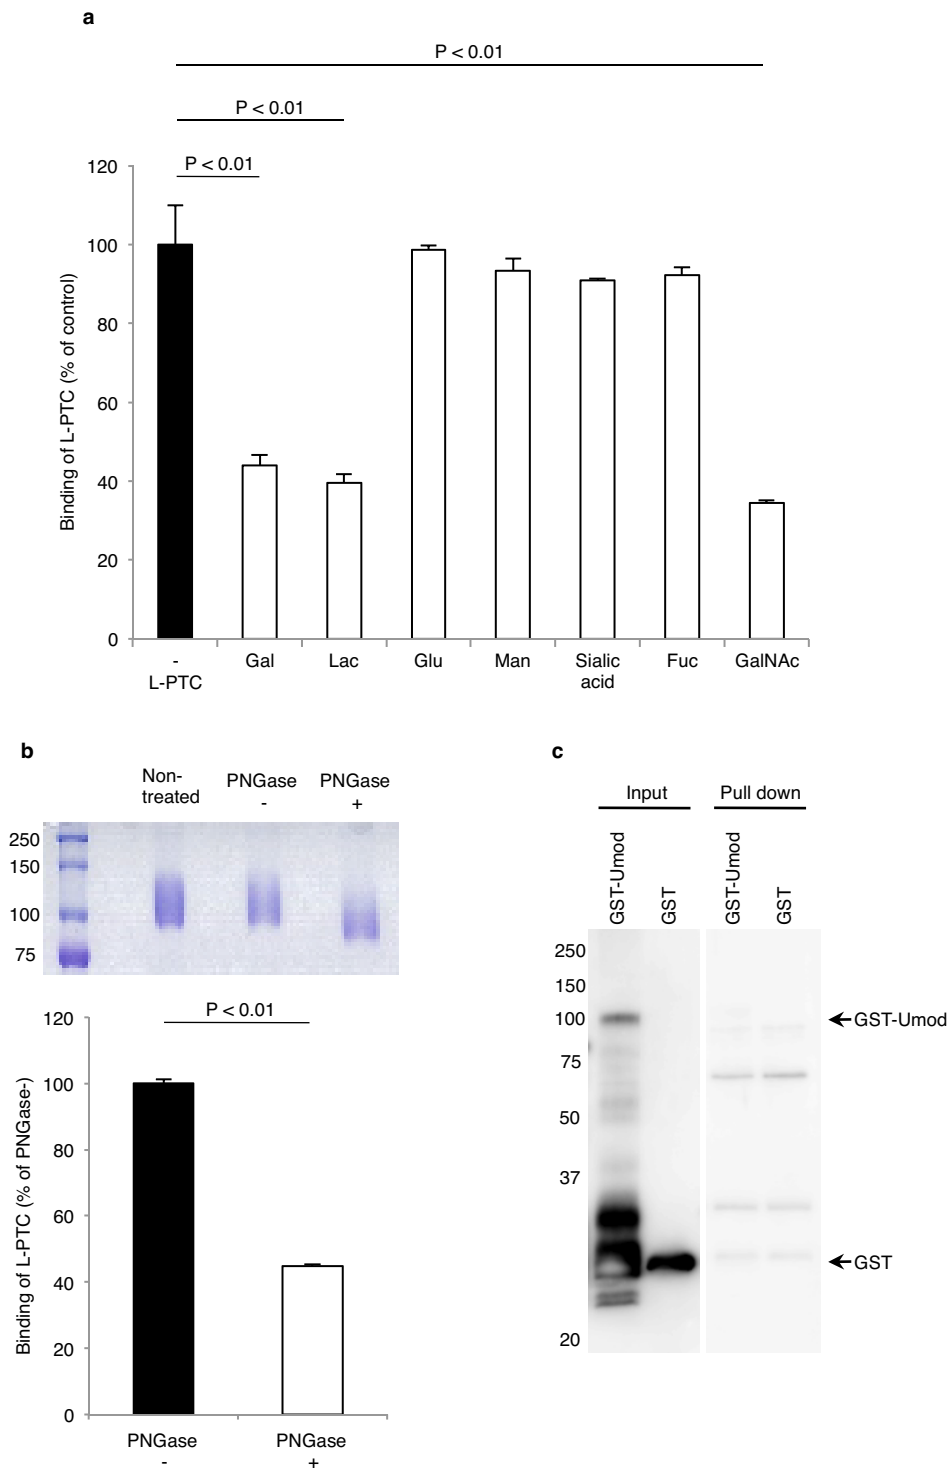

**Supplementary Figure 5: Binding of L-PTC to GP2 and uromodulin is mediated by sugar chains.** (a) L-PTC (100 nM) was pre-incubated with galactose (Gal), lactose (Lac),

glucose (Glu), mannose (Man), sialic acid, fucose (Fuc), or N-acetylgalactosamine (GalNAc) (10 mM), and then added to plates coated with mGP2-Fc proteins. Bound L-PTC was detected using anti-BoNT and HRP-labeled anti-rabbit IgG antibodies. The data are expressed as a percentage of the binding of L-PTC in the absence of added carbohydrates. Error bars indicate s.d. ( $n = 3$ ). Statistical analyses were performed with the Student's *t*-test. **(b)** Deglycosylation of mGP2-Fc was confirmed by SDS-PAGE. Binding of L-PTC to deglycosylated mGP2-Fc was analyzed by ELISA. Bound L-PTC was detected using anti-BoNT and HRP-labeled anti-rabbit IgG antibodies. Error bars indicate s.d. ( $n = 3$ ). Statistical analyses were performed with the Student's *t*-test. **(c)** GST-mouse uromodulin or GST was incubated with Strep-Tactin Superflow agarose pre-bound to HA. HA-bound proteins were analyzed by immunoblotting with anti-GST antibody and HRP-labeled anti-rabbit IgG antibody.

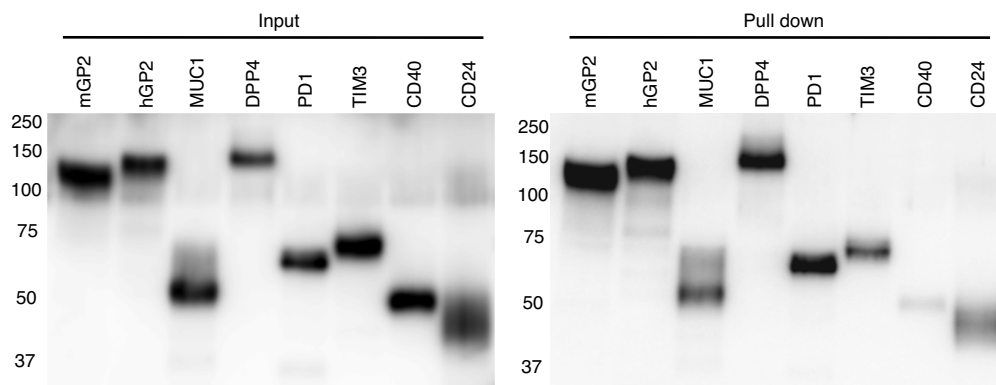

**Supplementary Figure 6: HA binds to various glycoproteins.** Recombinant Fc proteins were incubated with Strep-Tactin Superflow agarose pre-bound to HA. HA-bound proteins were analyzed by immunoblotting using HRP-labeled anti-human IgG antibody. Data are representative of two independent experiments.



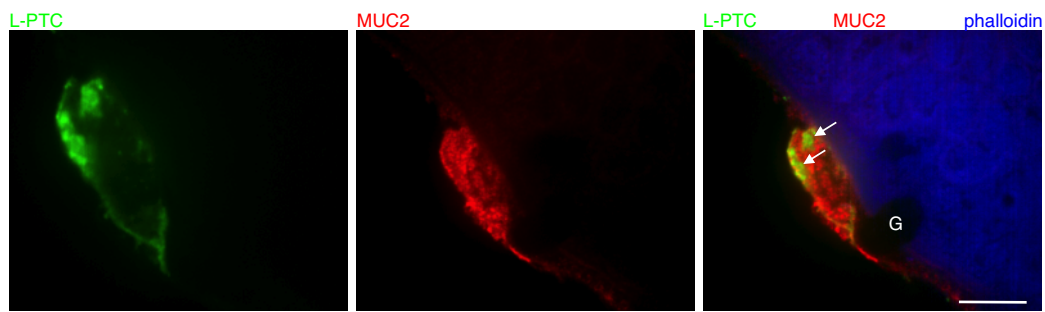

**Supplementary Figure 7: L-PTC is trapped into the mucus layer.** Alexa Fluor 488–labeled L-PTC (green) were injected into ligated mouse intestinal loops and incubated for 1 h. Whole-mount specimens were fixed with Carnoy’s solution and stained with anti-MUC2 antibody and Cy3–labeled anti-mouse IgG antibody (red) and iFluor 405–labeled phalloidin (blue). L-PTC was trapped in the mucus layer (arrows). G: goblet cell. Scale bar, 10  $\mu$ m. Data are representative of two independent experiments.

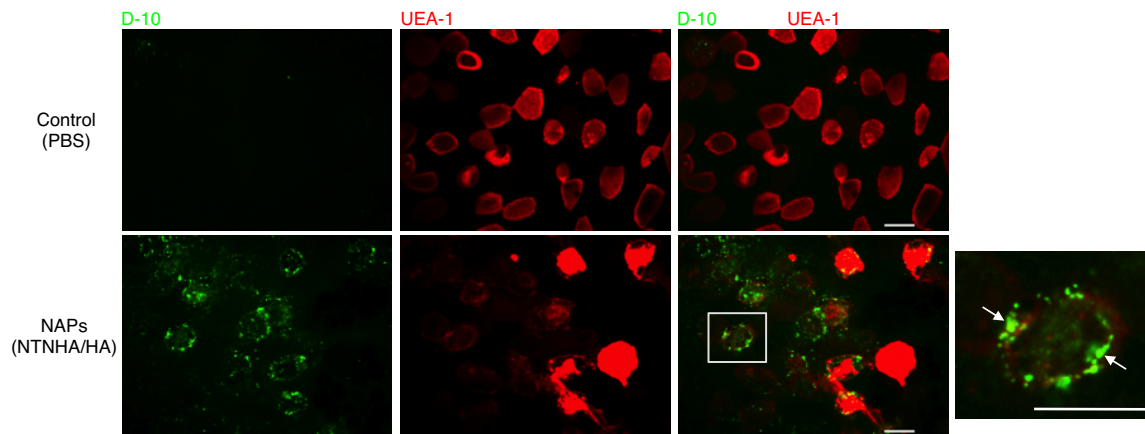

**Supplementary Figure 8: NAPs (NTNHA/HA) disrupt the paracellular barrier**

**around the M cells.** NAPs (NTNHA/HA) and paracellular tracer (fixable FITC–dextran 10K; D-10, green) or vehicle control (PBS) and the tracer were injected into ligated mouse intestinal loops and incubated for 2 h, and FAE regions were stained with rhodamine-labeled UEA-1 (red). Right panel shows a higher-magnification image of the boxed region. Paracellular tracer penetrated between M cells and enterocytes (arrows).

Scale bars: 10  $\mu$ m. Data are representative of two independent experiments.

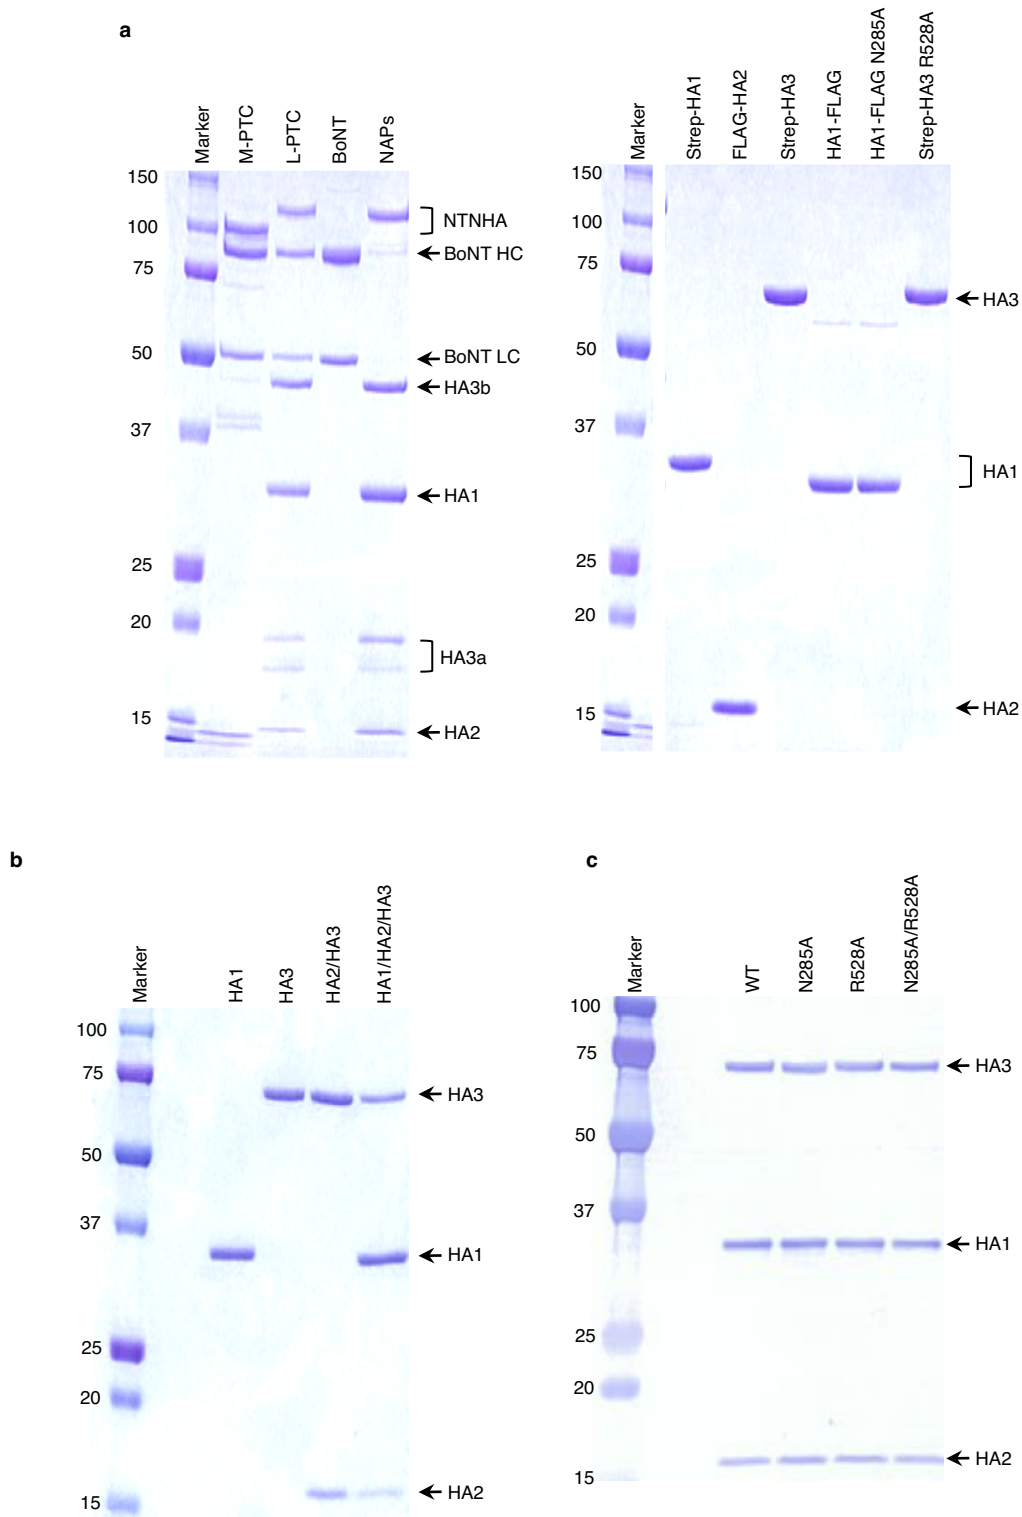

**Supplementary Figure 9: Toxins, NAPs, and recombinant HA proteins used in this**

**study.** (a) SDS-PAGE of M-PTC, L-PTC, BoNT, NAPs (2.0  $\mu\text{g}$ ), and recombinant HA protein (1.0  $\mu\text{g}$ ). HA3 protein is cleaved to yield two fragments, designated HA3a and HA3b (alternatively termed HA20 and HA52, respectively), in L-PTC and NAPs<sup>8</sup>. (b and c) Recombinant HA1, HA2, and HA3 proteins were mixed at a molar ratio of 4:4:1 (20  $\mu\text{M}$ :20  $\mu\text{M}$ :5  $\mu\text{M}$ ) in PBS (pH 7.4), and then incubated for 3 h at 37°C. Reconstituted HA (complex of Strep-HA1, FLAG-HA2, and Strep-HA3, b) and reconstituted HA harboring mutant HA1 or HA3 (complex of HA1-FLAG [N285A], FLAG-HA2, and Strep-HA3 [R528A], c) were confirmed by pull-down using Strep-Tactin Superflow agarose and SDS-PAGE.

Fig. 3a  
Input

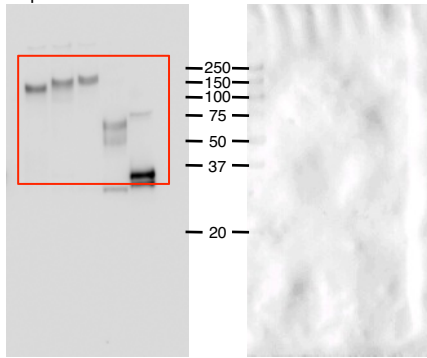

Pull down

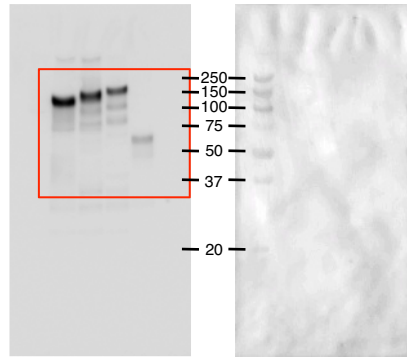

Fig. 5c

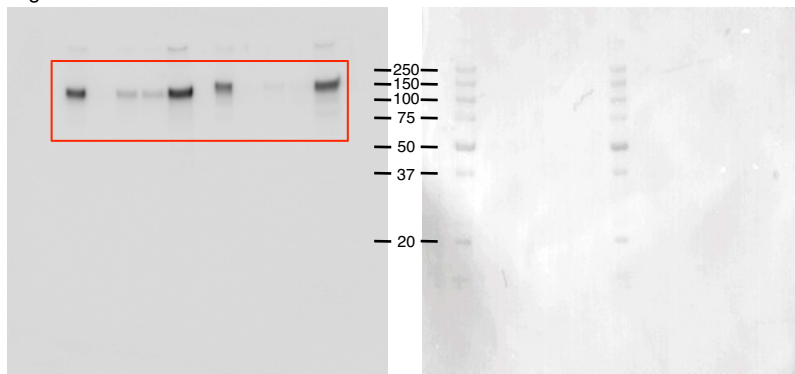

Fig. 5e

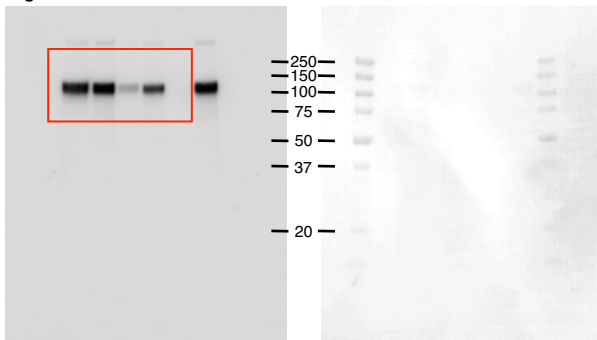

Fig. 5f

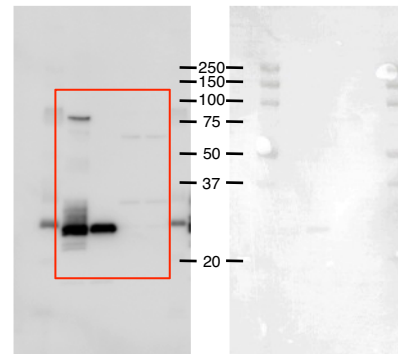

Supplementary Fig. 5b

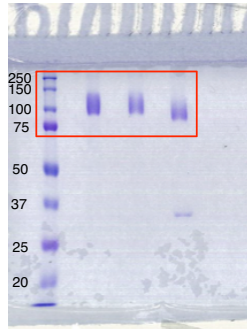

Supplementary Fig. 5c

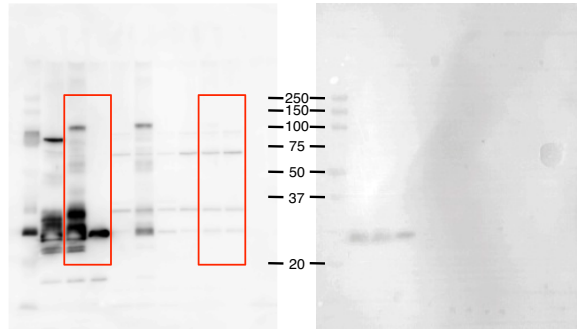

Supplementary Fig. 6  
Input

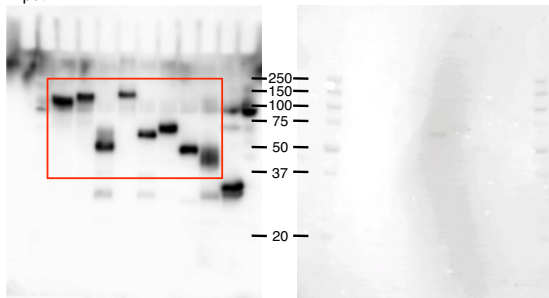

Pull down

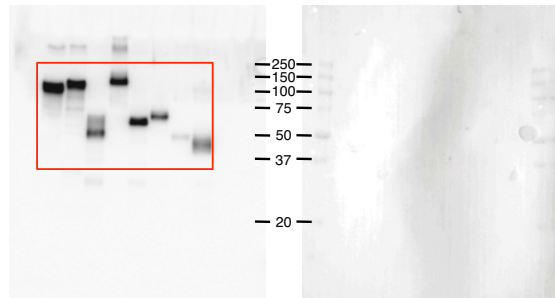

Supplementary Fig. 9a

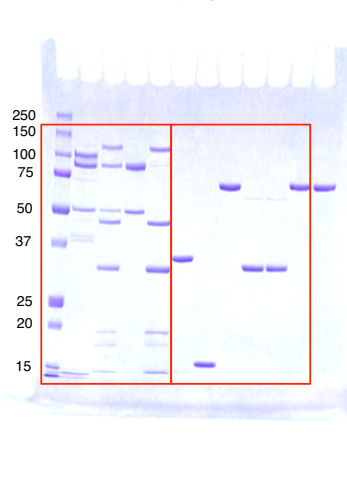

Supplementary Fig. 9b

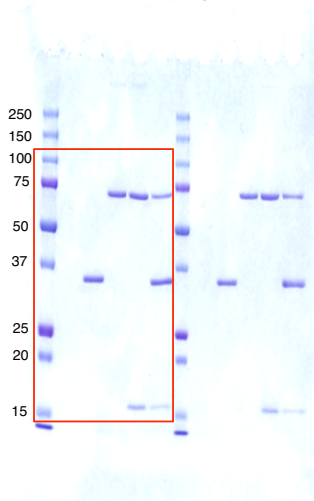

Supplementary Fig. 9c

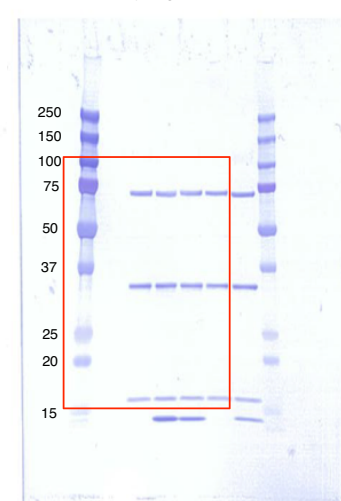

**Supplementary Figure 10: Uncropped scan images of immunoblots and SDS-PAGE gels (CBB staining).** The red boxed regions in the uncropped scan images were used in the manuscript. The right side of the uncropped chemiluminescence image is a bright-field image of the blot membrane, showing molecular markers (kDa).

**Supplementary Table 1: Primers sequences used in this study.**

| Primer                 | sequence (5'-3')                                            |
|------------------------|-------------------------------------------------------------|
| Strep-HA1-F            | GGAACGGTACCCAGTAATCCAAAATTCATTAATG                          |
| Strep-HA1-R            | ATAGTCGACTTATGGGTTACGAATATTCCA                              |
| FLAG-HA2-F             | TGAATAAGCTTTCAGTTGAAAGAACTTTTCTAC                           |
| FLAG-HA2-R             | CTTTGGTACCTTATATTTTTTCAAGTTTGAAC                            |
| Strep-HA3-F            | AAAGTTAGGTACCCTAGTGATACTATTGATTTAG                          |
| Strep-HA3-R            | CGTGTCGACTTAATTAGTAATATCTATATGC                             |
| HA1-FLAG-F             | CATGCCATGGTAATCCAAAATTCATTAATA                              |
| HA1-FLAG-R             | CGGGATCCTTACTTGTTCATCGTCATCCTTGTAGTCTGGGTTACGAATATTCCATTTTC |
| HA1-FLAG N285A-F       | GATGATGCTCAGAAATGGAATATTCGT                                 |
| HA1-FLAG N285A-R       | TTTCTGAGCATCATCTCCATGATAATT                                 |
| Strep-HA3 R528A-F      | TATACAGCTCAAAGCCCTGATGTCCATG                                |
| Strep-HA3 R528A-R      | GCTTTGAGCTGTATAGTAATGTGCACC                                 |
| mGP2-Fc-F              | GAAGATCTACCATGAAAAGGATGGTGGGTT                              |
| mGP2-Fc-R              | CCGCTCGAGTGTAGTGTGGGGAGTCCCC                                |
| hGP2-Fc-F              | CGCGGATCCACCATGGAAAGGATGGTGGGC                              |
| hGP2-Fc-R              | CCGCTCGAGTCCATTCATGACACCGGGAGA                              |
| Umod-Fc-F              | CGCAGATCTACCATGGGGATCCCTTTGACC                              |
| Umod-Fc-R              | CGCGTCGACCTTGGACACTGAGGCCTGG                                |
| PrP <sup>C</sup> -Fc-F | CGGGATCCACCATGGCGAACCTTGGCTACT                              |

**Supplementary Table 1: Primers sequences used in this study (continued).**

| Primer                            | sequence (5'-3')                            |
|-----------------------------------|---------------------------------------------|
| PrP <sup>C</sup> -Fc-R            | CGCTCGAGGGATCTTCTCCCCTCGTAATAG              |
| GST-mGP2-F                        | TCCAGGGGCCCCTGGGATCTACAATACATCAAGGTTATGGGAG |
| GST-mGP2-R                        | ATGCGGCCGCTCGAGTCATGTAGTGTGGGAGTCCCCTTC     |
| GST-Umod-F                        | TCCAGGGGCCCCTGGGAAGTAACTCAACAGAAGCGAGAC     |
| GST-Umod-R                        | ATGCGGCCGCTCGAGTCACTTGGACACTGAGGCCTGGAC     |
| <u>Used for qPCR</u>              |                                             |
| <i>Actb</i> -F                    | GAGCGCAAGTACTCTGTGTG                        |
| <i>Actb</i> -R                    | AACGCAGCTCAGTAACAGTCC                       |
| <i>Gapdh</i> -F                   | TGTGTGCGTCGTGGATCTGA                        |
| <i>Gapdh</i> -R                   | TTGCTGTTGAAGTCGCAGGAG                       |
| <i>Gp2</i> -F                     | AACTGCTATGCCACCCCTTC                        |
| <i>Gp2</i> -R                     | TCGGCTTCTGAGGACACAC                         |
| <i>Umod</i> -F                    | CAGGTGTTTCCAGGACAGAGG                       |
| <i>Umod</i> -R                    | CATTCAGAACACCGTCTCGC                        |
| <i>Prnp</i> -F                    | GGTCCCTTTGATGGAGTCTGTC                      |
| <i>Prnp</i> -R                    | TGTGGATGCTCTAGCTATCCCA                      |
| <u>Used for mGP2 transfection</u> |                                             |
| mGP2-F                            | GAAGATCTACCATGAAAAGGATGGTGGGTT              |
| mGP2-R                            | CCGCTCGAGGAACAGTAGAGCCAGGAAGAC              |
